# Supplementary material for: Rapid and sustained decline in CXCL-10 (IP-10) annotates clinical outcomes following TNF-α antagonist therapy in hospitalized patients with severe and critical COVID-19 respiratory failure
Source: bioRxiv or medRxiv preprint supplement (doi:10.1101/2021.05.29.21258010), 2021-06-02
Supplement: Supplementary file [file media-1.pdf]

# IL-6

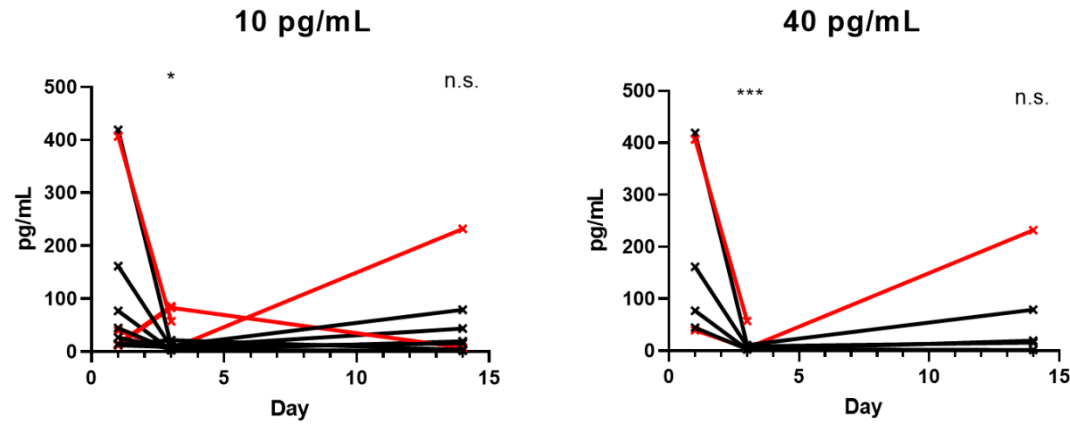

**Figure 1. Control of IL-6 in patients stratified by variable baseline elevations.** Inflammatory marker and cytokine expression was assessed by multiplex ELISA at days 0, 3 and 14 (or discharge). Expression values from individuals are connected with solid lines, with deceased individuals indicated in red. Values are plotted with exclusion of patients with baseline IL-6 expression lower than 10 (n=11) and 40 (n=6) pg/mL. Statistics: Paired ratio t-tests were used to compare the expression levels at days 3 and 14 to baseline. \*:  $P < 0.05$ , \*\*\*:  $P < 0.001$ , n.s.: not significant.

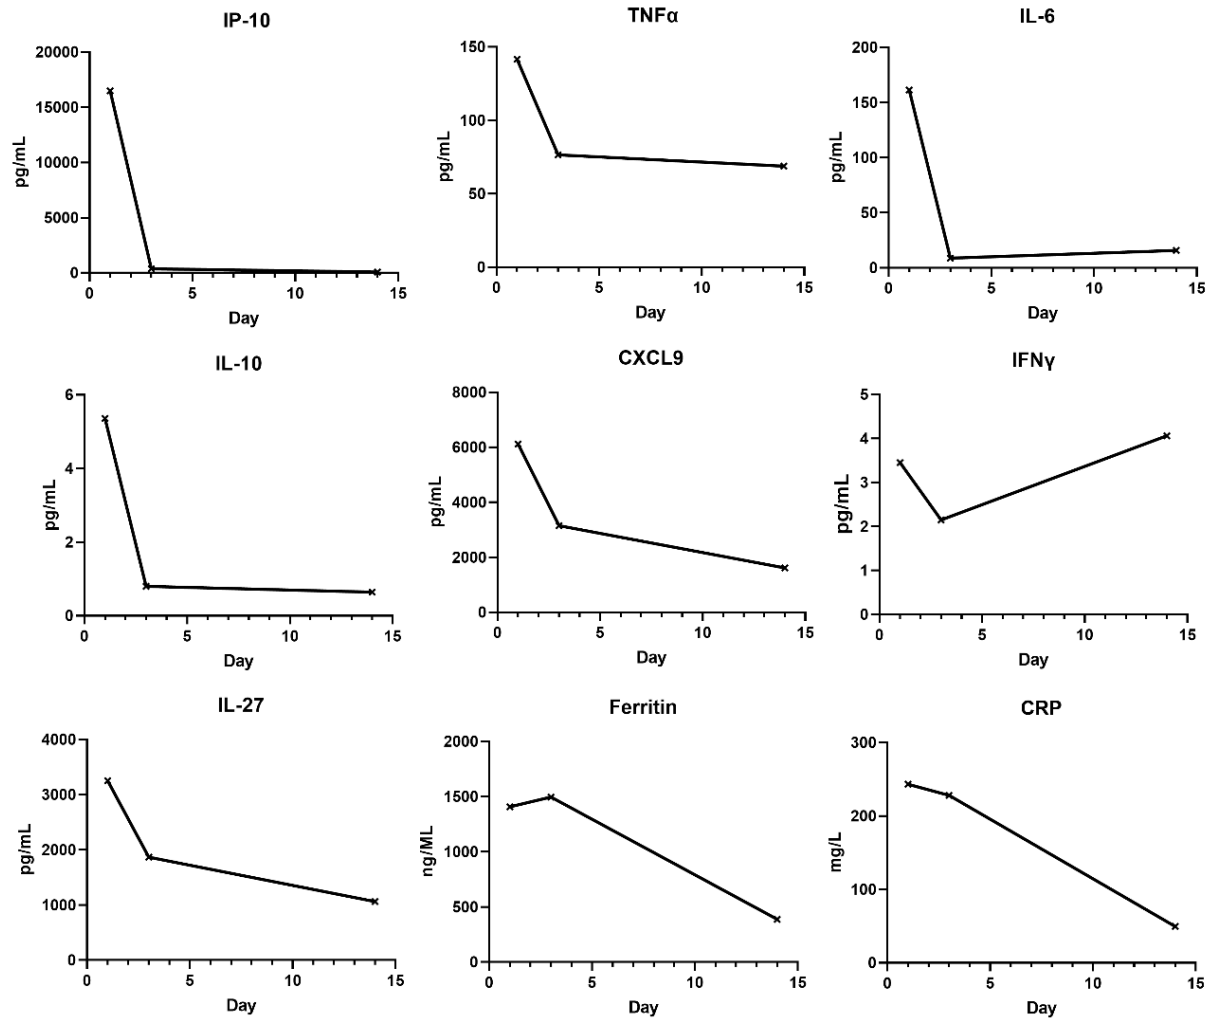

**Figure 2. Control of inflammatory markers and cytokines following infliximab therapy in a patient without prior steroid or remdesivir exposure.**

**Table 1. Change in cytokine levels at Days 3 and 14**

| Day 3        |          |                    | Day 14       |          |                    |
|--------------|----------|--------------------|--------------|----------|--------------------|
| Cytokine     | P-value  | FDR Critical value | Cytokine     | P-value  | FDR Critical value |
| TNFa         | 0.000071 | 0.001              | IP-10        | 0.00055  | 0.001              |
| IL-27        | 0.00012  | 0.002              | CRP          | 0.003039 | 0.002              |
| IP-10        | 0.00016  | 0.003              | IL-27        | 0.0088   | 0.003              |
| CRP          | 0.00058  | 0.004              | CXCL9        | 0.0088   | 0.004              |
| IFNy         | 0.002    | 0.005              | Ferritin     | 0.013907 | 0.005              |
| Ferritin     | 0.002098 | 0.006              | IL-22        | 0.017    | 0.006              |
| CXCL9        | 0.0088   | 0.007              | IL-5         | 0.021    | 0.007              |
| IL-12p40     | 0.011    | 0.008              | GROa         | 0.026    | 0.008              |
| IL-10        | 0.013    | 0.009              | TNFa         | 0.056    | 0.009              |
| Eotaxin      | 0.035    | 0.01               | VEGF-A       | 0.064    | 0.01               |
| IL-4         | 0.067    | 0.011              | IL-10        | 0.072    | 0.011              |
| IL-6         | 0.069    | 0.012              | IL-3         | 0.073    | 0.012              |
| GM-CSF       | 0.081    | 0.013              | G-CSF        | 0.15     | 0.013              |
| MCP-1        | 0.089    | 0.014              | IL-7         | 0.2      | 0.014              |
| MDC          | 0.097    | 0.015              | Fractalkine  | 0.22     | 0.015              |
| MCP-3        | 0.097    | 0.016              | FLT-3L       | 0.22     | 0.016              |
| M-CSF        | 0.098    | 0.017              | IL-17E/IL-25 | 0.22     | 0.017              |
| IL-8         | 0.14     | 0.018              | IL-6         | 0.24     | 0.018              |
| IL-17A       | 0.16     | 0.019              | IL-15        | 0.26     | 0.019              |
| Fractalkine  | 0.16     | 0.02               | IL-17F       | 0.26     | 0.02               |
| EGF          | 0.17     | 0.021              | GM-CSF       | 0.27     | 0.021              |
| IL-13        | 0.17     | 0.022              | IL-4         | 0.28     | 0.022              |
| VEGF-A       | 0.18     | 0.023              | FGF-2        | 0.29     | 0.023              |
| GROa         | 0.21     | 0.024              | Eotaxin      | 0.33     | 0.024              |
| FLT-3L       | 0.22     | 0.025              | EGF          | 0.33     | 0.025              |
| sCD4OL       | 0.26     | 0.026              | IL-18        | 0.33     | 0.026              |
| G-CSF        | 0.3      | 0.027              | IL-1RA       | 0.33     | 0.027              |
| IL-9         | 0.38     | 0.028              | TNFB         | 0.38     | 0.028              |
| IL-12p70     | 0.39     | 0.029              | MCP-3        | 0.39     | 0.029              |
| IL-18        | 0.41     | 0.03               | IL-12p40     | 0.4      | 0.03               |
| TGFa         | 0.41     | 0.031              | IL-9         | 0.41     | 0.031              |
| IL-1a        | 0.42     | 0.032              | IFN-a2       | 0.46     | 0.032              |
| FGF-2        | 0.45     | 0.033              | RANTES       | 0.48     | 0.033              |
| TNFB         | 0.45     | 0.034              | IL-1B        | 0.5      | 0.034              |
| IL-22        | 0.46     | 0.035              | sCD4OL       | 0.53     | 0.035              |
| IFN-a2       | 0.49     | 0.036              | IL-8         | 0.55     | 0.036              |
| IL-2         | 0.52     | 0.037              | IL-2         | 0.65     | 0.037              |
| IL-1B        | 0.66     | 0.038              | TGFa         | 0.66     | 0.038              |
| IL-17E/IL-25 | 0.66     | 0.039              | MIP-1a       | 0.67     | 0.039              |
| IL-15        | 0.68     | 0.04               | PDGF-AB/BB   | 0.68     | 0.04               |
| IL-5         | 0.7      | 0.041              | IL-13        | 0.69     | 0.041              |
| MIP-1B       | 0.7      | 0.042              | MIP-1B       | 0.73     | 0.042              |
| PDGF-AB/BB   | 0.71     | 0.043              | MDC          | 0.74     | 0.043              |
| IL-17F       | 0.88     | 0.044              | IL-17A       | 0.77     | 0.044              |
| PDGF-AA      | 0.89     | 0.045              | M-CSF        | 0.78     | 0.045              |
| IL-7         | 0.9      | 0.046              | MCP-1        | 0.82     | 0.046              |
| IL-3         | 0.92     | 0.047              | IL-12p70     | 0.83     | 0.047              |
| RANTES       | 0.93     | 0.048              | IL-1a        | 0.84     | 0.048              |
| IL-1RA       | 0.94     | 0.049              | IFNy         | 0.87     | 0.049              |
| MIP-1a       | 0.98     | 0.05               | PDGF-AA      | 0.98     | 0.05               |

A 5% false-discovery rate (FDR) adjustment was applied using the Benjamini-Hochberg method. The cytokines are ordered in ascending p-value; green highlighting denotes statistical significance after the FDR correction.

**Table 2: Pearson correlation between dynamic changes in IP-10 with other cytokines**

| Total (n=17)    |       | Lymphopenic (n=13) |       | Recovered* by day 3 (n=6) |       | Non-lymphopenic (n=4) |              |
|-----------------|-------|--------------------|-------|---------------------------|-------|-----------------------|--------------|
| MIG/CXCL9       | 0.65  | MIG/CXCL9          | 0.84  | MIG/CXCL9                 | 0.98  | IL-12p40              | 0.99         |
| IL-15           | 0.60  | IL-3               | 0.71  | M-CSF                     | 0.83  | sCD40L                | 0.95         |
| FLT-3L          | 0.60  | IL-15              | 0.70  | IL-1RA                    | 0.74  | EGF                   | 0.93         |
| IL-12p40        | 0.58  | M-CSF              | 0.67  | G-CSF                     | 0.70  | FGF-2                 | 0.91         |
| IL-3            | 0.57  | FLT-3L             | 0.62  | IL-3                      | 0.63  | MDC                   | 0.90         |
| M-CSF           | 0.56  | RANTES             | 0.62  | IL-15                     | 0.63  | IFN- $\alpha$ 2       | 0.90         |
| MDC             | 0.53  | IL-17F             | 0.61  | IL-10                     | 0.59  | IL-5                  | 0.85         |
| IFN- $\alpha$ 2 | 0.51  | IL-18              | 0.61  | IL-8                      | 0.59  | IL-17E/IL-25          | 0.84         |
| IL-5            | 0.50  | GRO $\alpha$       | 0.61  | TNF $\alpha$              | 0.57  | FLT-3L                | 0.77         |
| IL-18           | 0.48  | IL-12p40           | 0.59  | IFN $\gamma$              | 0.56  | PDGF-AB/BB            | 0.73         |
| IL-1RA          | 0.45  | IL-10              | 0.55  | FLT-3L                    | 0.43  | IL-1RA                | 0.71         |
| RANTES          | 0.45  | PDGF-AA            | 0.54  | IL-6                      | 0.42  | TGF $\alpha$          | 0.70         |
| IL-10           | 0.45  | IL-8               | 0.53  | IL-17F                    | 0.38  | IL-4                  | 0.66         |
| sCD40L          | 0.44  | IFN $\gamma$       | 0.50  | CRP                       | 0.36  | PDGF-AA               | 0.60         |
| TNF $\alpha$    | 0.42  | IL-17A             | 0.46  | GRO $\alpha$              | 0.31  | Ferritin              | 0.60         |
| TGF $\alpha$    | 0.41  | sCD40L             | 0.46  | IL-18                     | 0.30  | MCP-1                 | 0.54         |
| PDGF-AA         | 0.40  | MDC                | 0.46  | IL-12p40                  | 0.28  | Fractalkine           | 0.53         |
| IL-8            | 0.36  | MIP-1 $\alpha$     | 0.44  | sCD40L                    | 0.24  | TNF $\alpha$          | 0.50         |
| MIP-1 $\alpha$  | 0.35  | IL-1RA             | 0.43  | MIP-1 $\beta$             | 0.20  | VEGF-A                | 0.50         |
| PDGF-AB/BB      | 0.35  | PDGF-AB/BB         | 0.42  | RANTES                    | 0.15  | RANTES                | 0.49         |
| IL-17E/IL-25    | 0.35  | IFN- $\alpha$ 2    | 0.40  | MCP-3                     | 0.07  | IL-8                  | 0.49         |
| IFN $\gamma$    | 0.34  | IL-12p70           | 0.38  | PDGF-AA                   | 0.07  | IL-27                 | 0.43         |
| GRO $\alpha$    | 0.30  | FGF-2              | 0.35  | Fractalkine               | -0.04 | M-CSF                 | 0.39         |
| IL-12p70        | 0.29  | TNF $\alpha$       | 0.35  | IL-22                     | -0.07 | IL-9                  | 0.39         |
| FGF-2           | 0.29  | MCP-1              | 0.34  | Eotaxin                   | -0.10 | IL-1 $\beta$          | 0.28         |
| MCP-1           | 0.27  | IL-6               | 0.34  | IL-17A                    | -0.12 | IL-10                 | 0.28         |
| IL-2            | 0.26  | TGF $\alpha$       | 0.33  | IL-13                     | -0.15 | GM-CSF                | 0.27         |
| IL-27           | 0.24  | IL-4               | 0.33  | IL-12p70                  | -0.17 | MCP-3                 | 0.19         |
| IL-4            | 0.23  | Eotaxin            | 0.33  | TNF $\beta$               | -0.18 | IL-3                  | 0.16         |
| Eotaxin         | 0.23  | IL-5               | 0.32  | IL-2                      | -0.21 | MIP-1 $\beta$         | 0.16         |
| IL-7            | 0.21  | IL-2               | 0.31  | IL-4                      | -0.21 | Eotaxin               | 0.16         |
| GM-CSF          | 0.21  | G-CSF              | 0.31  | IL-1 $\alpha$             | -0.26 | IL-15                 | 0.13         |
| EGF             | 0.21  | IL-1 $\alpha$      | 0.28  | IFN- $\alpha$ 2           | -0.33 | IL-1 $\alpha$         | 0.05         |
| G-CSF           | 0.19  | GM-CSF             | 0.28  | IL-7                      | -0.34 | IL-7                  | 0.01         |
| IL-6            | 0.19  | IL-7               | 0.25  | PDGF-AB/BB                | -0.39 | MIP-1 $\alpha$        | 0.00         |
| CRP             | 0.17  | IL-1 $\beta$       | 0.24  | MDC                       | -0.40 | IL-13                 | -0.02        |
| VEGF-A          | 0.17  | EGF                | 0.22  | Ferritin                  | -0.43 | IFN $\gamma$          | -0.08        |
| IL-17A          | 0.15  | VEGF-A             | 0.21  | MCP-1                     | -0.43 | IL-12p70              | -0.09        |
| IL-9            | 0.14  | IL-9               | 0.18  | EGF                       | -0.44 | IL-18                 | -0.10        |
| IL-1 $\beta$    | 0.12  | CRP                | 0.17  | VEGF-A                    | -0.45 | TNF $\beta$           | -0.12        |
| MIP-1 $\beta$   | 0.11  | MIP-1 $\beta$      | 0.17  | IL-5                      | -0.46 | IL-2                  | -0.12        |
| IL-17F          | 0.09  | IL-27              | 0.14  | TGF $\alpha$              | -0.53 | IL-6                  | -0.17        |
| IL-22           | 0.06  | IL-22              | 0.14  | IL-27                     | -0.53 | <b>MIG/CXCL9</b>      | <b>-0.22</b> |
| MCP-3           | 0.04  | IL-13              | 0.12  | GM-CSF                    | -0.59 | G-CSF                 | -0.25        |
| IL-13           | 0.02  | IL-17E/IL-25       | 0.11  | MIP-1 $\alpha$            | -0.61 | IL-22                 | -0.31        |
| TNF $\beta$     | -0.01 | TNF $\beta$        | 0.07  | IL-17E/IL-25              | -0.63 | GRO $\alpha$          | -0.39        |
| IL-1 $\alpha$   | -0.01 | MCP-3              | -0.15 | IL-9                      | -0.74 | IL-17F                | -0.45        |
| Ferritin        | -0.04 | Fractalkine        | -0.23 | IL-1 $\beta$              | -0.81 | CRP                   | -0.53        |
| Fractalkine     | -0.21 | Ferritin           | -0.29 | FGF-2                     | -0.85 | IL-17A                | -0.53        |

Pearson r correlation coefficients were calculated between changes in levels of IP-10 with changes in levels of other cytokines between day 3 and baseline. Correlations in each subset of patients are displayed in descending order.

\*Recovered to an absolute lymphocyte count of at least 1.0

**Table 3: Secondary Infections following infliximab-abda therapy**

| Patients | Diagnosis              | Diagnostic certainty | Organism(s) if isolated         | Time to diagnosis (days) | Time to treatment (days) | Duration of antimicrobial therapy (days) | Death due to secondary infection(s) |
|----------|------------------------|----------------------|---------------------------------|--------------------------|--------------------------|------------------------------------------|-------------------------------------|
| 1        | VAP                    | Suspected            | NA                              | 5                        | 5                        | 6                                        | No                                  |
| 2        | VAP                    | Confirmed            | <i>Pseudomonas aeruginosa</i>   | 3                        | 4                        | 5                                        | NA                                  |
| 3        | CAPA                   | Probable             | <i>Aspergillus fumigatus</i>    | 3                        | 3                        | 41                                       | NA                                  |
|          | CMV viremia            | Confirmed            | CMV                             | 25                       | NA                       | NA                                       |                                     |
|          | VAP                    | Confirmed            | <i>Acinetobacter baumannii</i>  | 26                       | 32                       | 9                                        |                                     |
| 4        | VAP                    | Confirmed            | MRSA, MDR-Klebsiella            | 2                        | 3                        | 14                                       | Confirmed                           |
|          | HSV pneumonitis        | Confirmed            | HSV                             | At autopsy               | NA                       | NA                                       |                                     |
| 5        | VAP                    | Suspected            | NA                              | 12                       | 13                       | 15                                       | NA                                  |
|          | Tracheostomy site SSTI | Confirmed            | Polymicrobial                   | 21                       | 25                       | 6                                        |                                     |
|          | CMV viremia            | Confirmed            | CMV                             | 24                       | NA                       | NA                                       |                                     |
| 6        | VAP                    | Confirmed            | Polymicrobial                   | 1                        | 1                        | 9                                        | Suspected                           |
|          | CAPA                   | Probable             | NA                              | 6                        | 6                        | 3                                        |                                     |
| 7        | VAP                    | Suspected            | NA                              | 5                        | 5                        | 22                                       | NA                                  |
|          | Invasive candidiasis   | Suspected            | NA                              | 15                       | 23                       | 7                                        |                                     |
| 8        | CAP                    | Confirmed            | <i>Streptococcus pneumoniae</i> | 1                        | 1                        | 6                                        | Suspected                           |
|          | HSV pneumonitis        | Confirmed            | HSV-1                           | 14                       | 16                       | 13                                       |                                     |
|          | CAPA                   | Possible             | <i>Aspergillus niger</i>        | 35                       | 22                       | 13                                       |                                     |

VAP: Ventilator-associated pneumonia; CAPA: COVID-19-associated pulmonary aspergillosis; CMV: Cytomegalovirus; MRSA: Methicillin-resistant *Staphylococcus aureus*; HSV: Herpes simplex virus; CAP: Community-acquired pneumonia; MDR: Multidrug resistant; SSTI: Skin and soft tissue infection; NA: Not applicable.
